# Supplementary material
Source: PubMed Central journal article supplement (PMC3678964)
Supplement: NIHMS419587-supplement-1_si_001.pdf [file NIHMS419587-supplement-1_si_001.pdf]

## Supporting Information

### Sulfonyl Fluoride Inhibitors of Fatty Acid Amide Hydrolase

Shakiru O. Alapafuja,<sup>†</sup> Spyros P. Nikas,<sup>\*,†</sup> Indu Bharatan,<sup>†</sup> Vidyanand G. Shukla,<sup>†</sup> Mahmoud L. Nasr,<sup>†</sup> Anna L. Bowman,<sup>†</sup> Nikolai Zvonok,<sup>†</sup> Jing Li,<sup>†</sup> Xiaomeng Shi,<sup>#</sup> John R. Engen,<sup>#</sup> and Alexandros Makriyannis.<sup>\*,†</sup>

<sup>†</sup>Center for Drug Discovery and Departments of Chemistry and Chemical Biology and Pharmaceutical Sciences, Northeastern University, Boston, MA, 02115, USA.

<sup>#</sup>Department of Chemistry and Chemical Biology and Barnett Institute of Chemical and Biological Analysis, Northeastern University, Boston, MA, 02115, USA.

\*To whom correspondence should be addressed.

**Table 1S:** Elemental analyses

| Compd.     | Mol. Formula                                      | Calcd.            | Found             |
|------------|---------------------------------------------------|-------------------|-------------------|
| <b>11a</b> | C <sub>9</sub> H <sub>11</sub> FO <sub>2</sub> S  | C: 53.45; H, 5.48 | C: 53.68, H: 5.67 |
| <b>11b</b> | C <sub>10</sub> H <sub>13</sub> FO <sub>2</sub> S | C: 55.54; H, 6.06 | C: 55.88, H: 5.77 |
| <b>11c</b> | C <sub>11</sub> H <sub>15</sub> FO <sub>2</sub> S | C: 57.37; H, 6.56 | C: 57.69, H: 6.91 |
| <b>11d</b> | C <sub>12</sub> H <sub>17</sub> FO <sub>2</sub> S | C: 58.99; H, 7.01 | C: 59.18, H: 7.13 |
| <b>11e</b> | C <sub>13</sub> H <sub>19</sub> FO <sub>2</sub> S | C: 60.44; H, 7.41 | C: 60.17, H: 7.10 |
| <b>11f</b> | C <sub>14</sub> H <sub>21</sub> FO <sub>2</sub> S | C: 61.73; H, 7.77 | C: 61.41, H: 7.89 |
| <b>20a</b> | C <sub>20</sub> H <sub>25</sub> FO <sub>3</sub> S | C: 65.91; H, 6.91 | C: 66.16, H: 7.13 |
| <b>20b</b> | C <sub>20</sub> H <sub>25</sub> FO <sub>3</sub> S | C: 65.91; H, 6.91 | C: 65.63, H: 6.74 |
| <b>20c</b> | C <sub>20</sub> H <sub>25</sub> FO <sub>3</sub> S | C: 65.91; H, 6.91 | C: 66.22, H: 7.11 |
| <b>20d</b> | C <sub>18</sub> H <sub>21</sub> FO <sub>3</sub> S | C: 64.26; H, 6.29 | C: 64.21, H: 6.03 |
| <b>21a</b> | C <sub>13</sub> H <sub>19</sub> FO <sub>3</sub> S | C: 56.91; H, 6.98 | C: 56.76, H: 7.21 |
| <b>21b</b> | C <sub>13</sub> H <sub>19</sub> FO <sub>3</sub> S | C: 56.91; H, 6.98 | C: 56.64, H: 6.74 |
| <b>21c</b> | C <sub>13</sub> H <sub>19</sub> FO <sub>3</sub> S | C: 56.91; H, 6.98 | C: 57.23, H: 7.27 |
| <b>21d</b> | C <sub>11</sub> H <sub>15</sub> FO <sub>3</sub> S | C: 53.64; H, 6.14 | C: 53.75, H: 6.36 |
| <b>26</b>  | C <sub>17</sub> H <sub>19</sub> FO <sub>4</sub> S | C: 60.34; H, 5.66 | C: 60.45, H: 5.87 |
| <b>27</b>  | C <sub>21</sub> H <sub>28</sub> O <sub>4</sub> S  | C: 66.99; H, 7.50 | C: 66.67, H: 7.19 |
